# Supplementary material
Source: publisher site journal article supplement (https://www.dovepress.com/article/558568)
Supplement: Supplementary file 1 [file 558568_Supplementary%20Materials-R1_2.docx]

**Supplementary Table S1.**The excluded component variables for composite indicators

| **Composite indicators** | **Component variables** | | | |
| --- | --- | --- | --- | --- |
| UAR | UA | ALB |  |  |
| AISI | N | M | PLT | L |
| SIRI | N | M | L |  |
| SII | N | PLT | L |  |
| NPAR | N | ALB |  |  |
| NLR | N | L |  |  |
| PLR | PLT | L |  |  |
| LMR | L | M |  |  |
| ApoB/ApoA1 | ApoB | ApoA1 |  |  |

UA, uric acid; ALB, albumin; N, neutrophils; M, monocytes; PLT, blood platelets; L, lymphocytes; ApoB, apolipoprotein B; ApoA1, apolipoprotein A1; UAR,uric acid-to-albumin ratio; AISI; systemic inflammation aggregation index; SIRI,systemic inflammatory response index; SII,systemic immune-inflammatory index; NPAR,neutrophil-to-albumin ratio; NLR,neutrophil-to-lymphocyte ratio; PLR,platelet-to-lymphocyte ratio; LMR,lymphocyte-to-monocyte ratio; ApoB/ApoA1,apolipoprotein B/apolipoprotein A1 rat

**Supplementary Table S2.** Classification performance metrics of machine learning models at optimal thresholds.

| | **Model** | | --- | | **Set** | **Threshold** | **TP** | **FN** | **FP** | **TN** |
| --- | --- | --- | --- | --- | --- | --- | --- |
| LR | Train | 0.263 | 201 | 74 | 171 | 804 |
| Validation | 0.216 | 101 | 14 | 78 | 343 |
| SVM | Train | 0.185 | 246 | 29 | 128 | 847 |
| Validation | 0.214 | 97 | 18 | 86 | 335 |
| RF | Train | 0,203 | 269 | 6 | 44 | 931 |
| Validation | 0.213 | 90 | 25 | 85 | 336 |
| GBM | Train | 0.246 | 216 | 59 | 136 | 839 |
| Validation | 0.284 | 89 | 26 | 48 | 373 |
| XGBoost | Train | 0.294 | 240 | 35 | 87 | 888 |
| Validation | 0.289 | 91 | 24 | 46 | 375 |

TP: True Positive; FN: False Negative; FP: False Positive; TN: True Negative


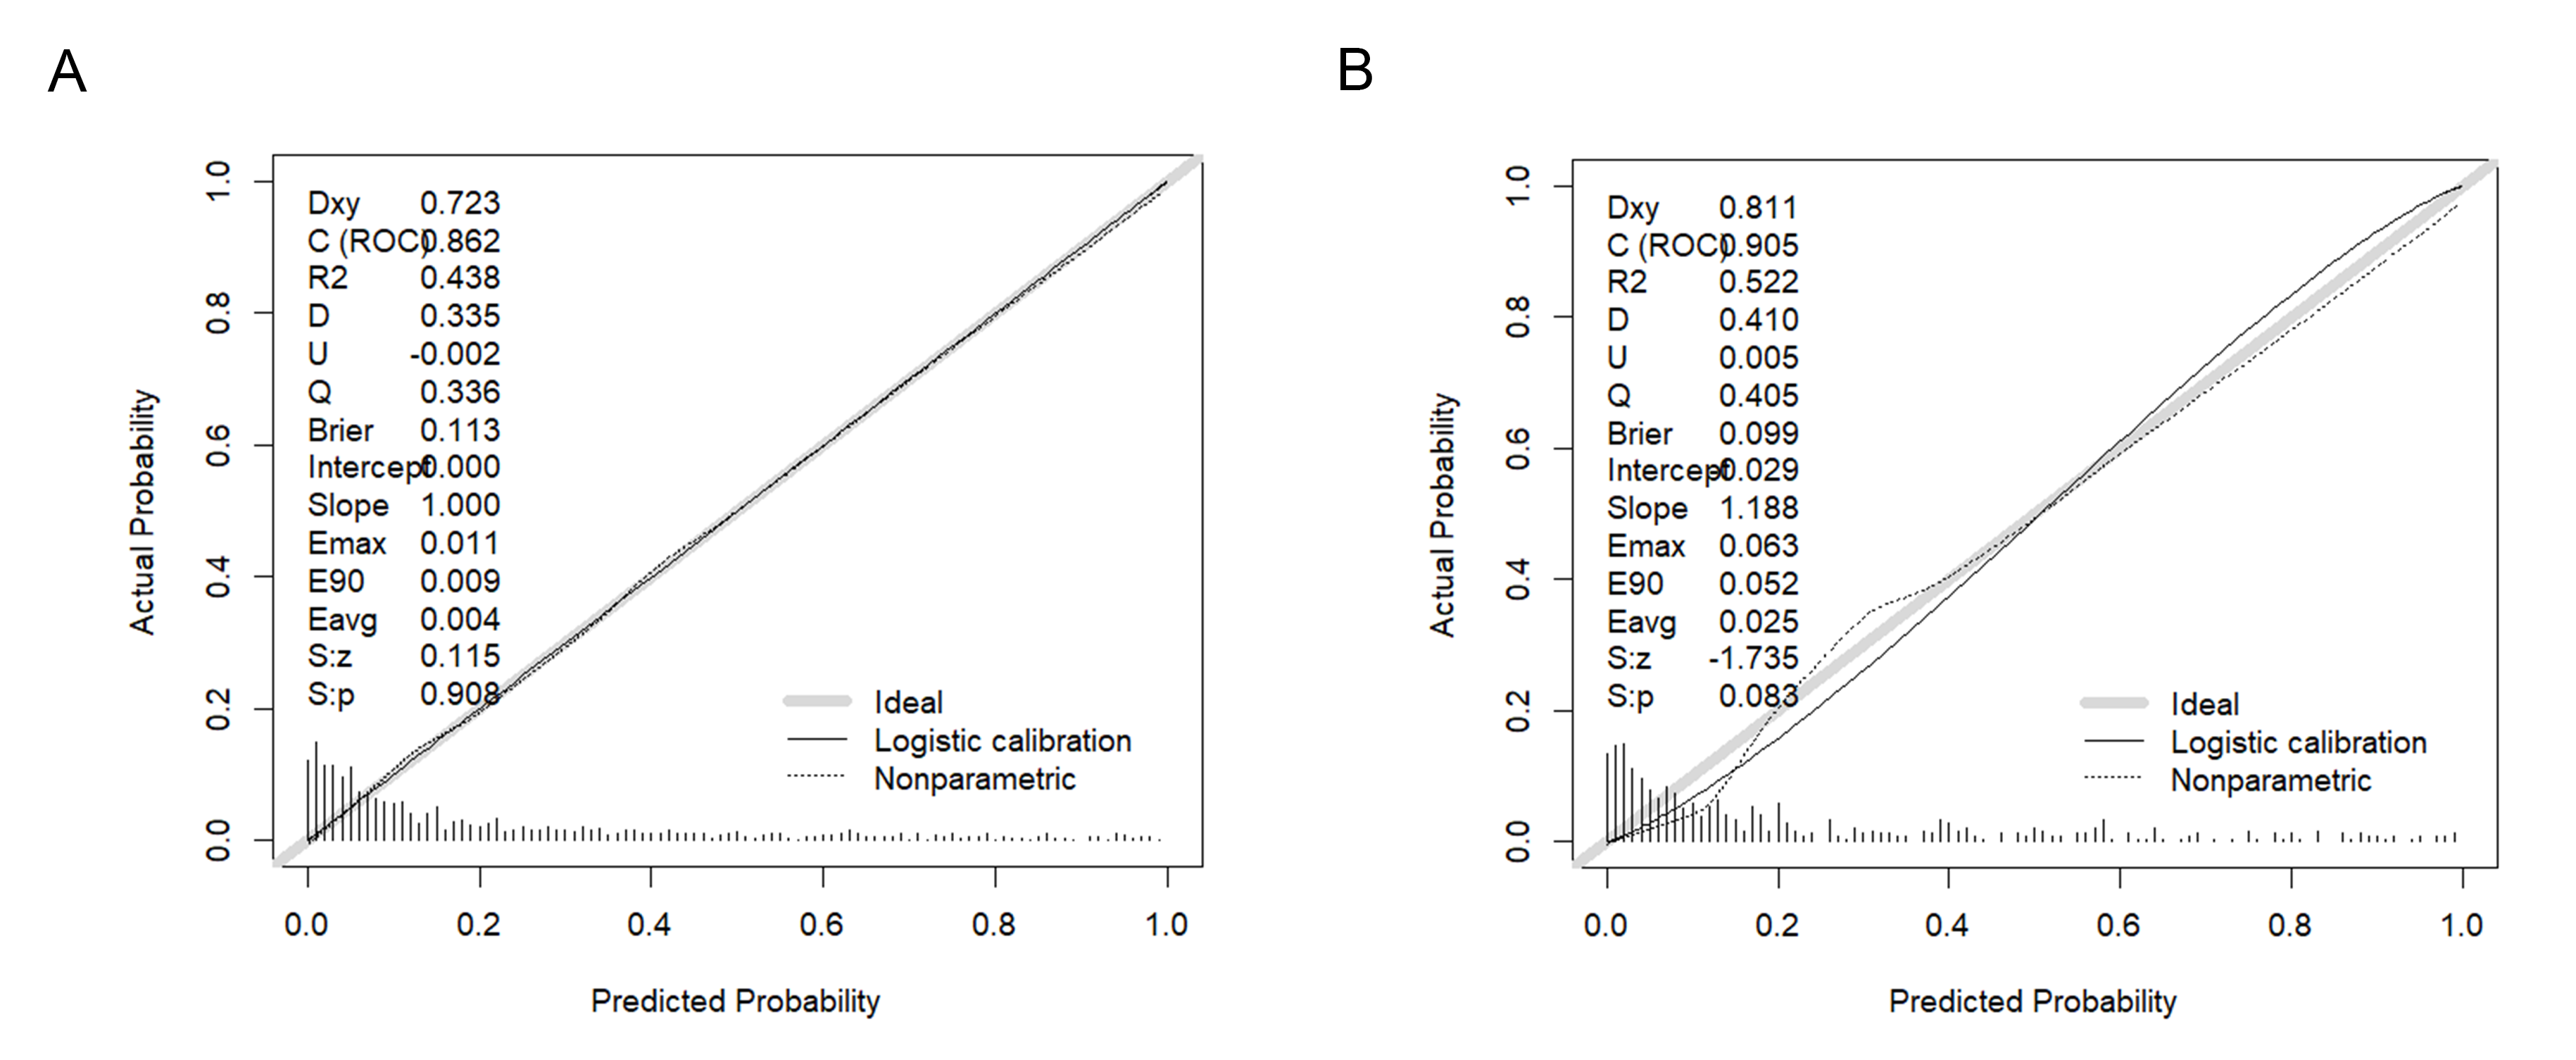


Figure S1 (A): Calibration curve of the LR train set; (B): Calibration curve of the LR validation set;


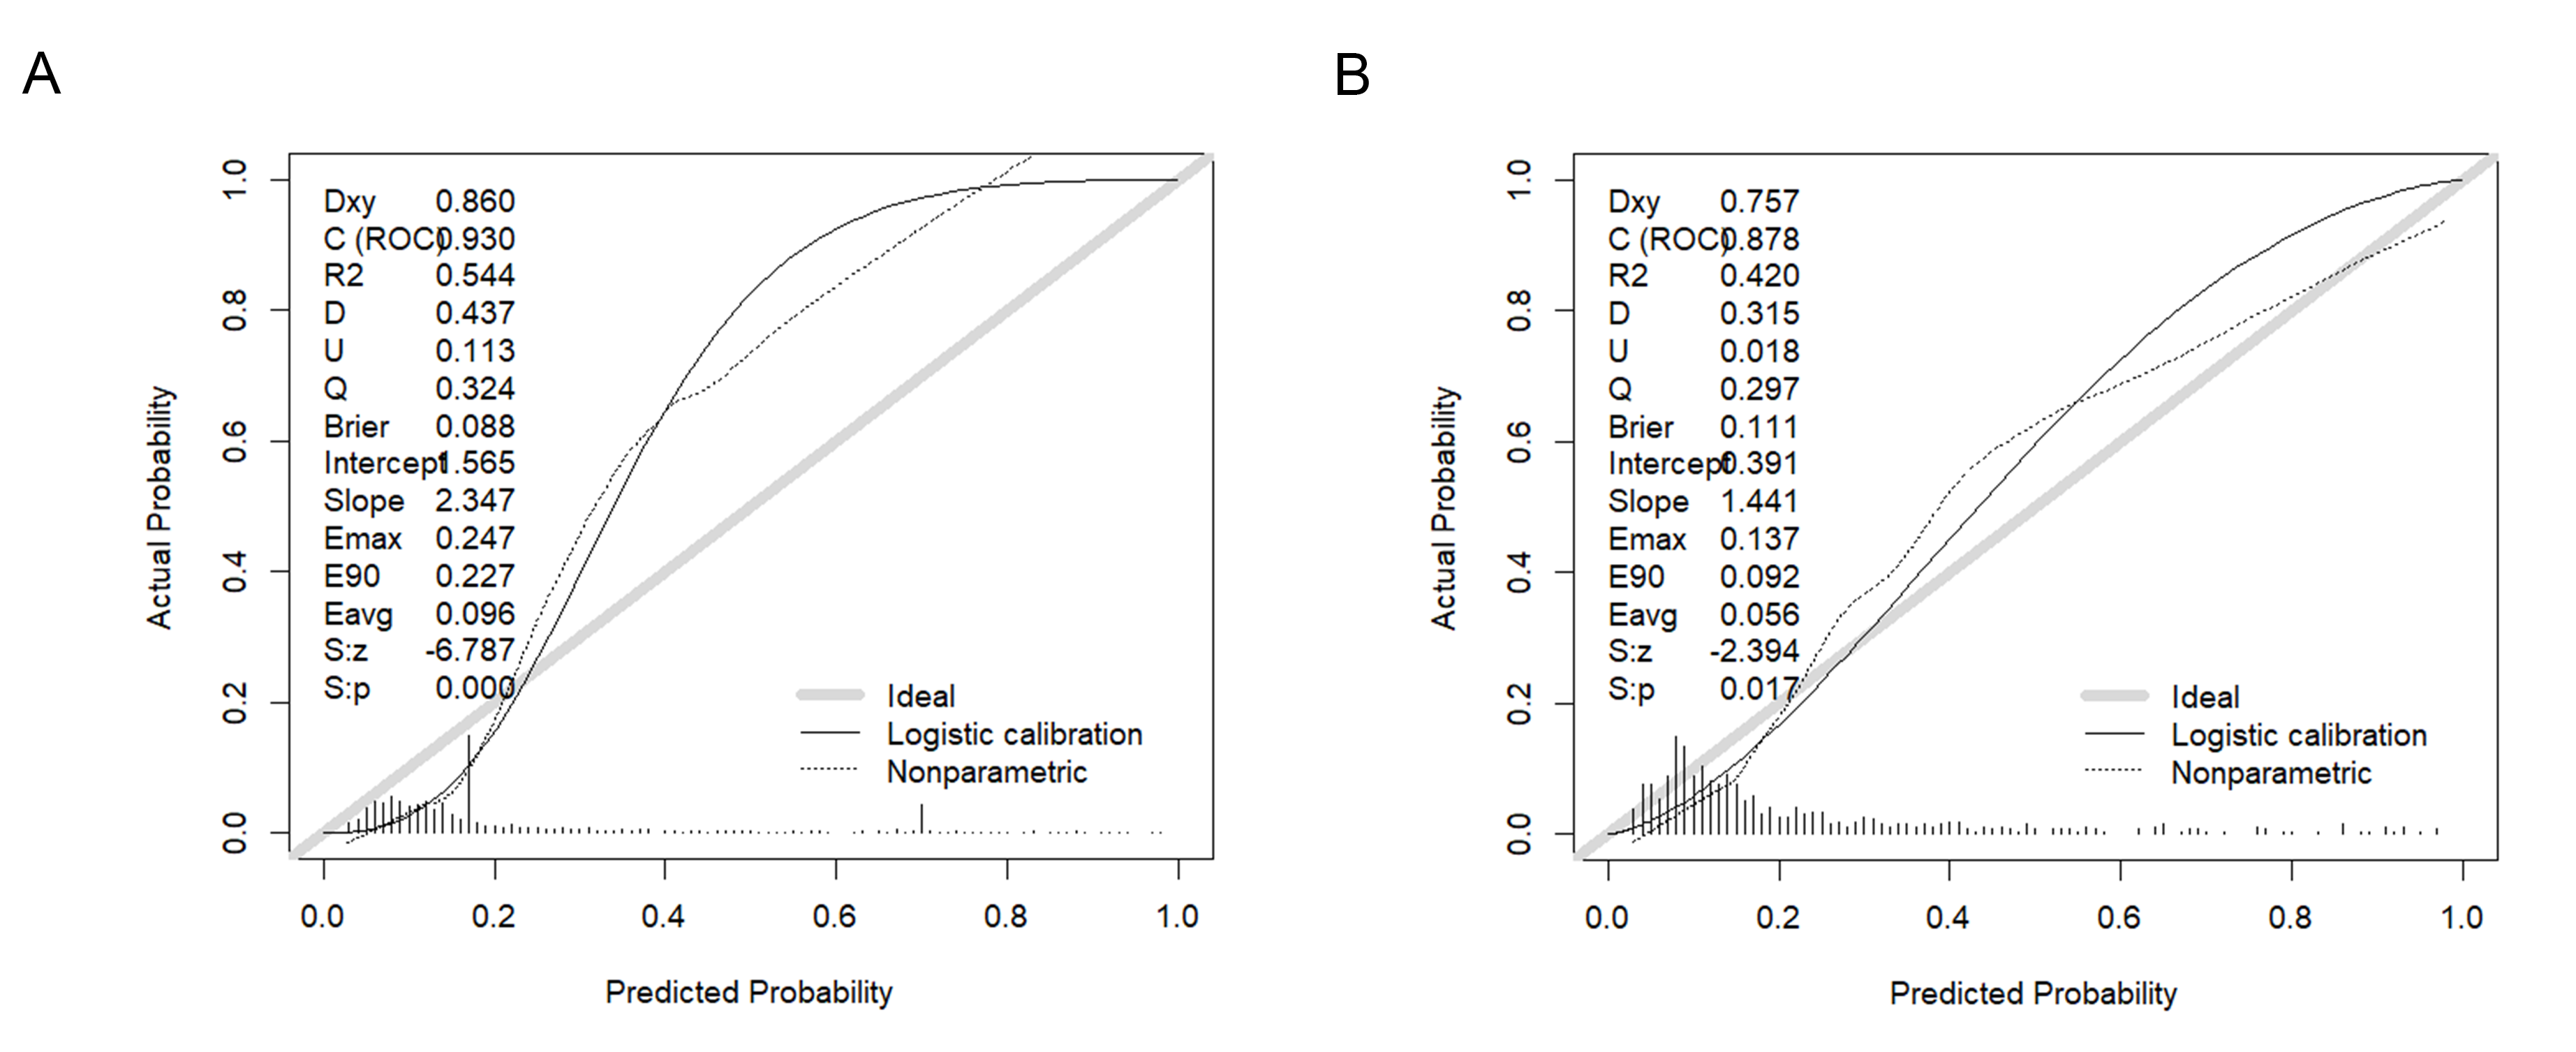


Figure S2 (A): Calibration curve of the SVM train set; (B): Calibration curve of the SVM validation set;


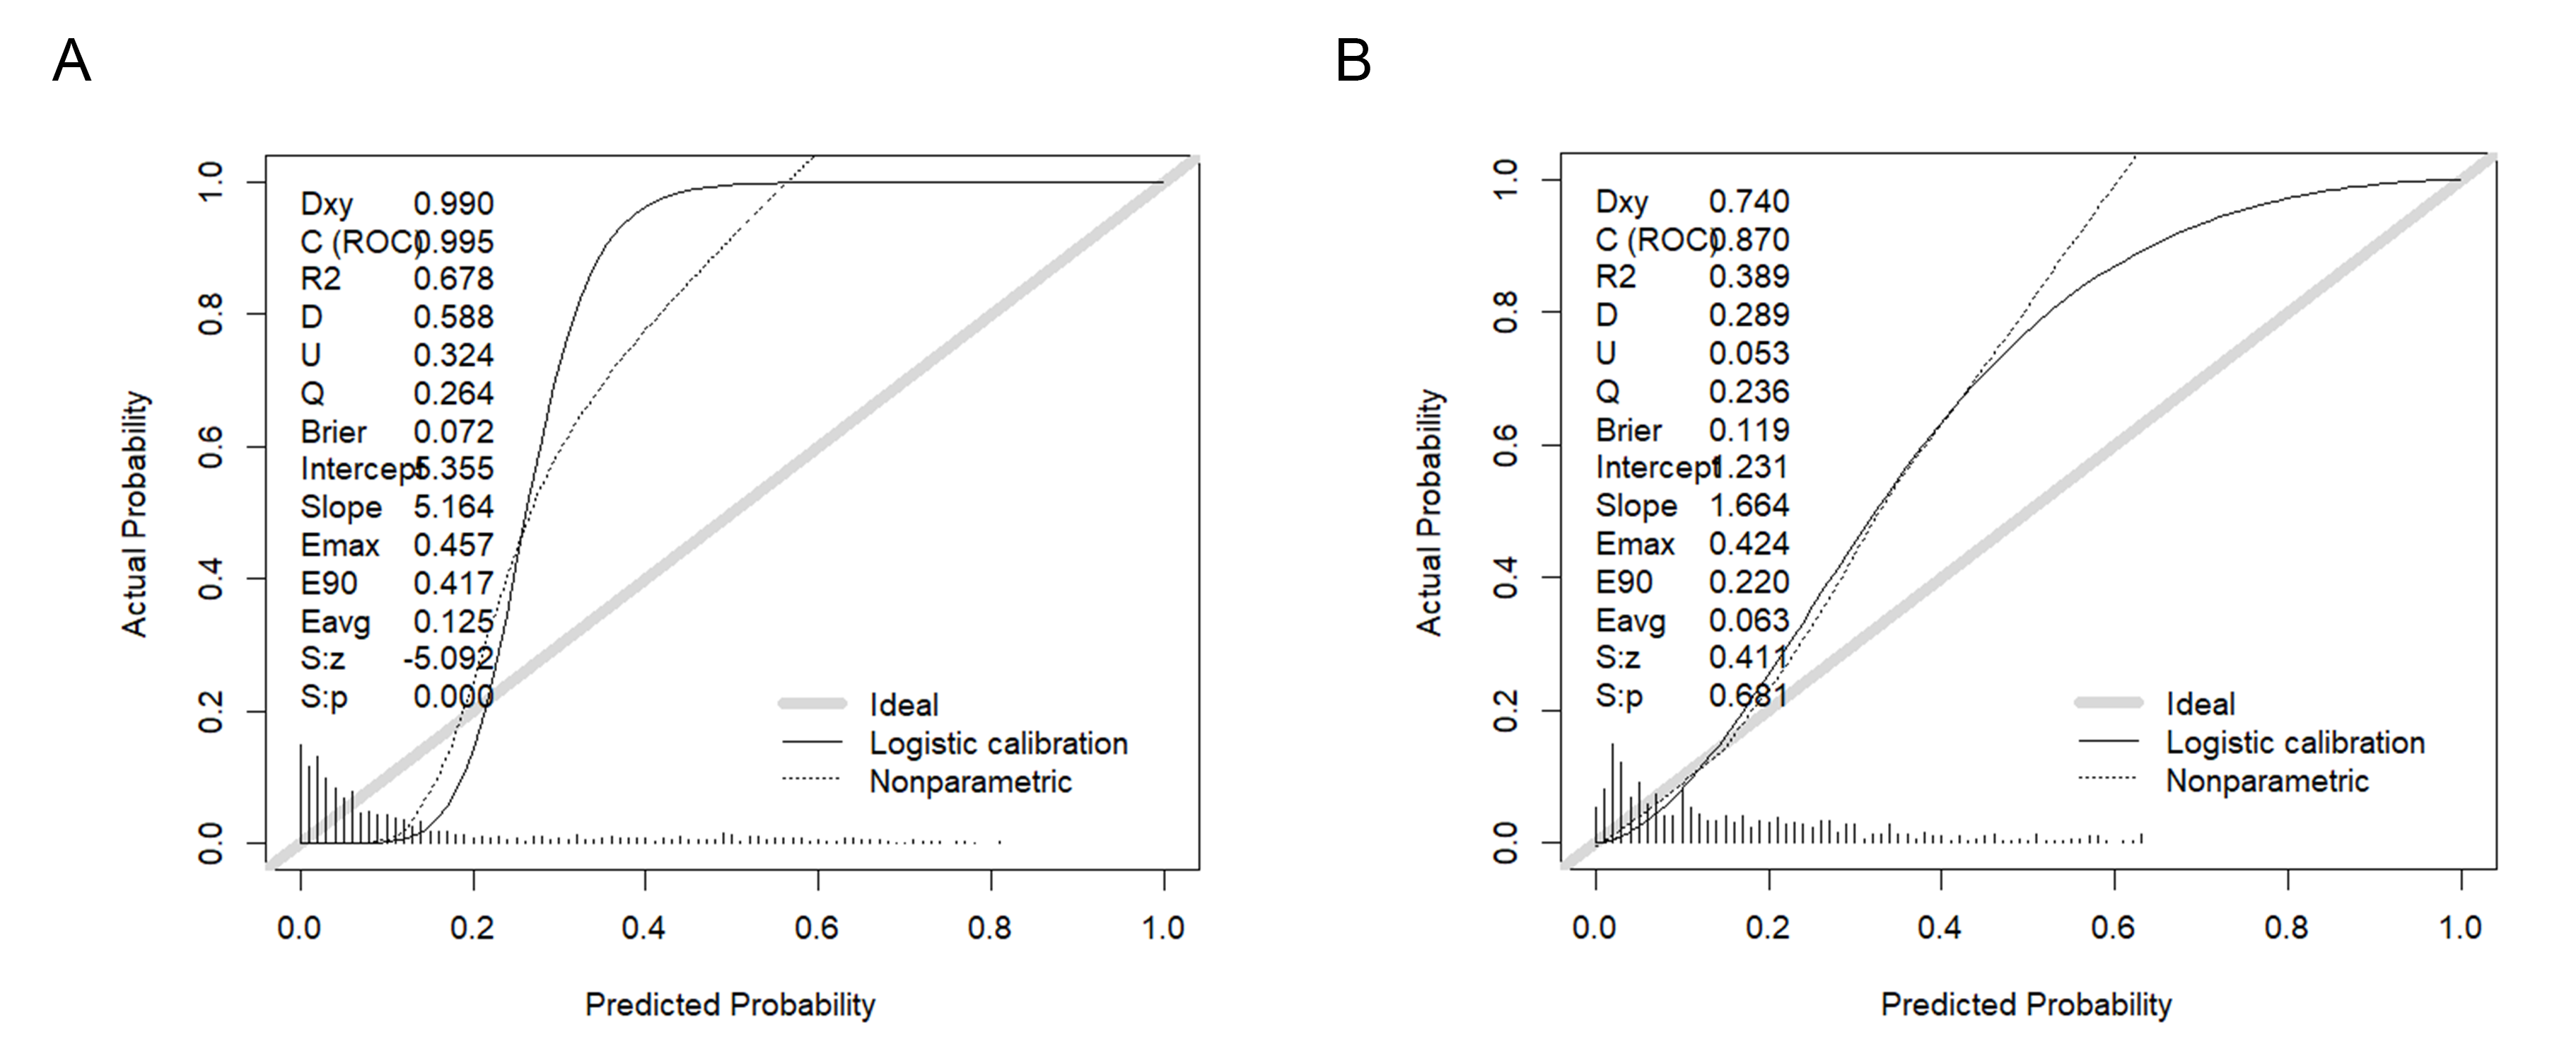


Figure S3 (A): Calibration curve of the RF train set; (B): Calibration curve of the RF validation set;


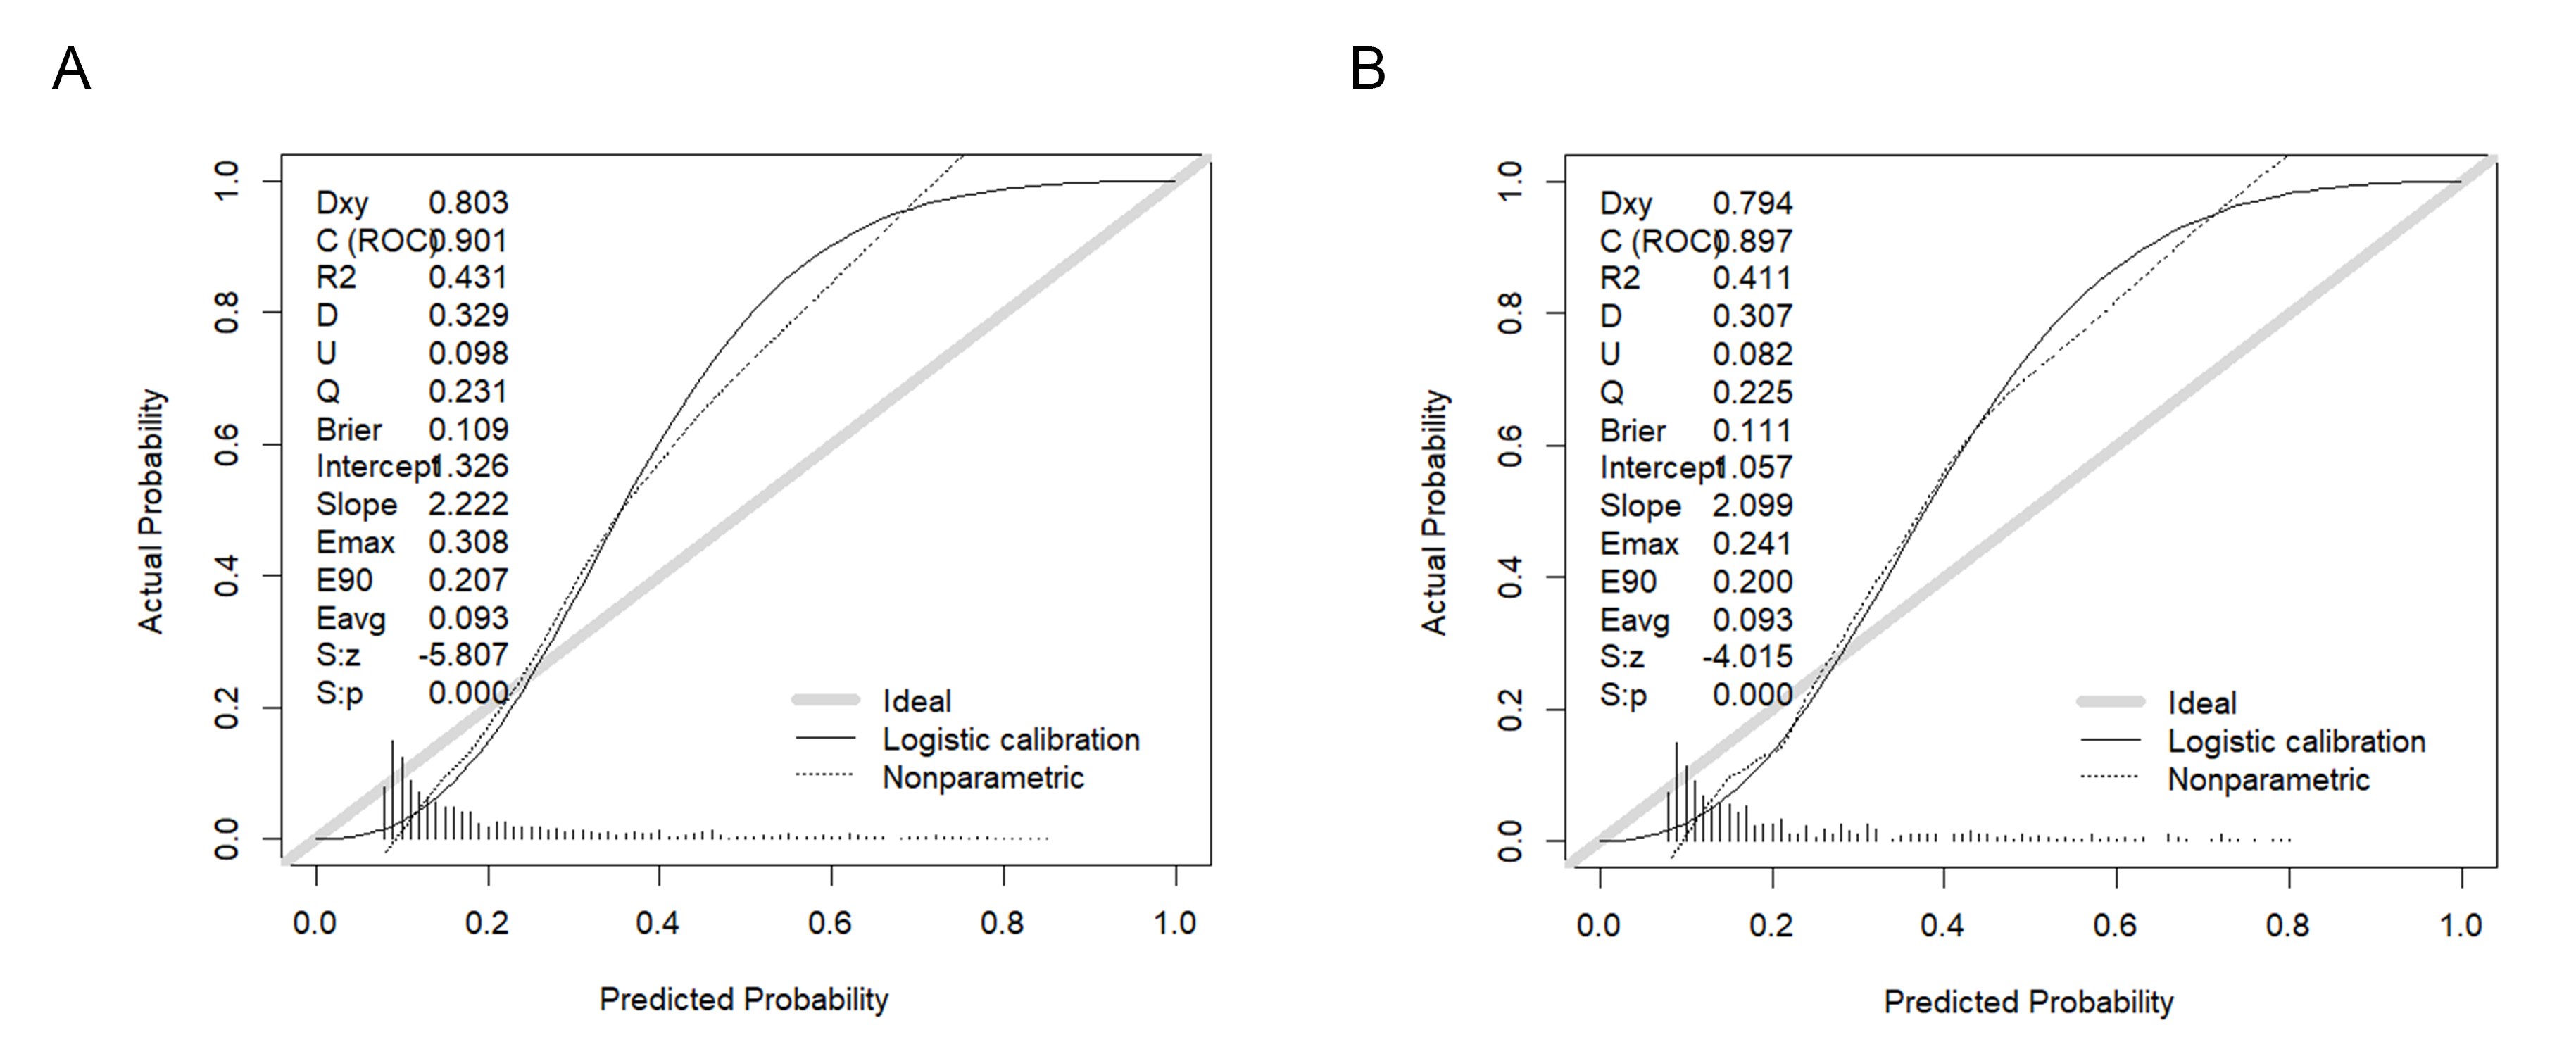


Figure S4 (A): Calibration curve of the GBM train set; (B): Calibration curve of the GBM validation set;


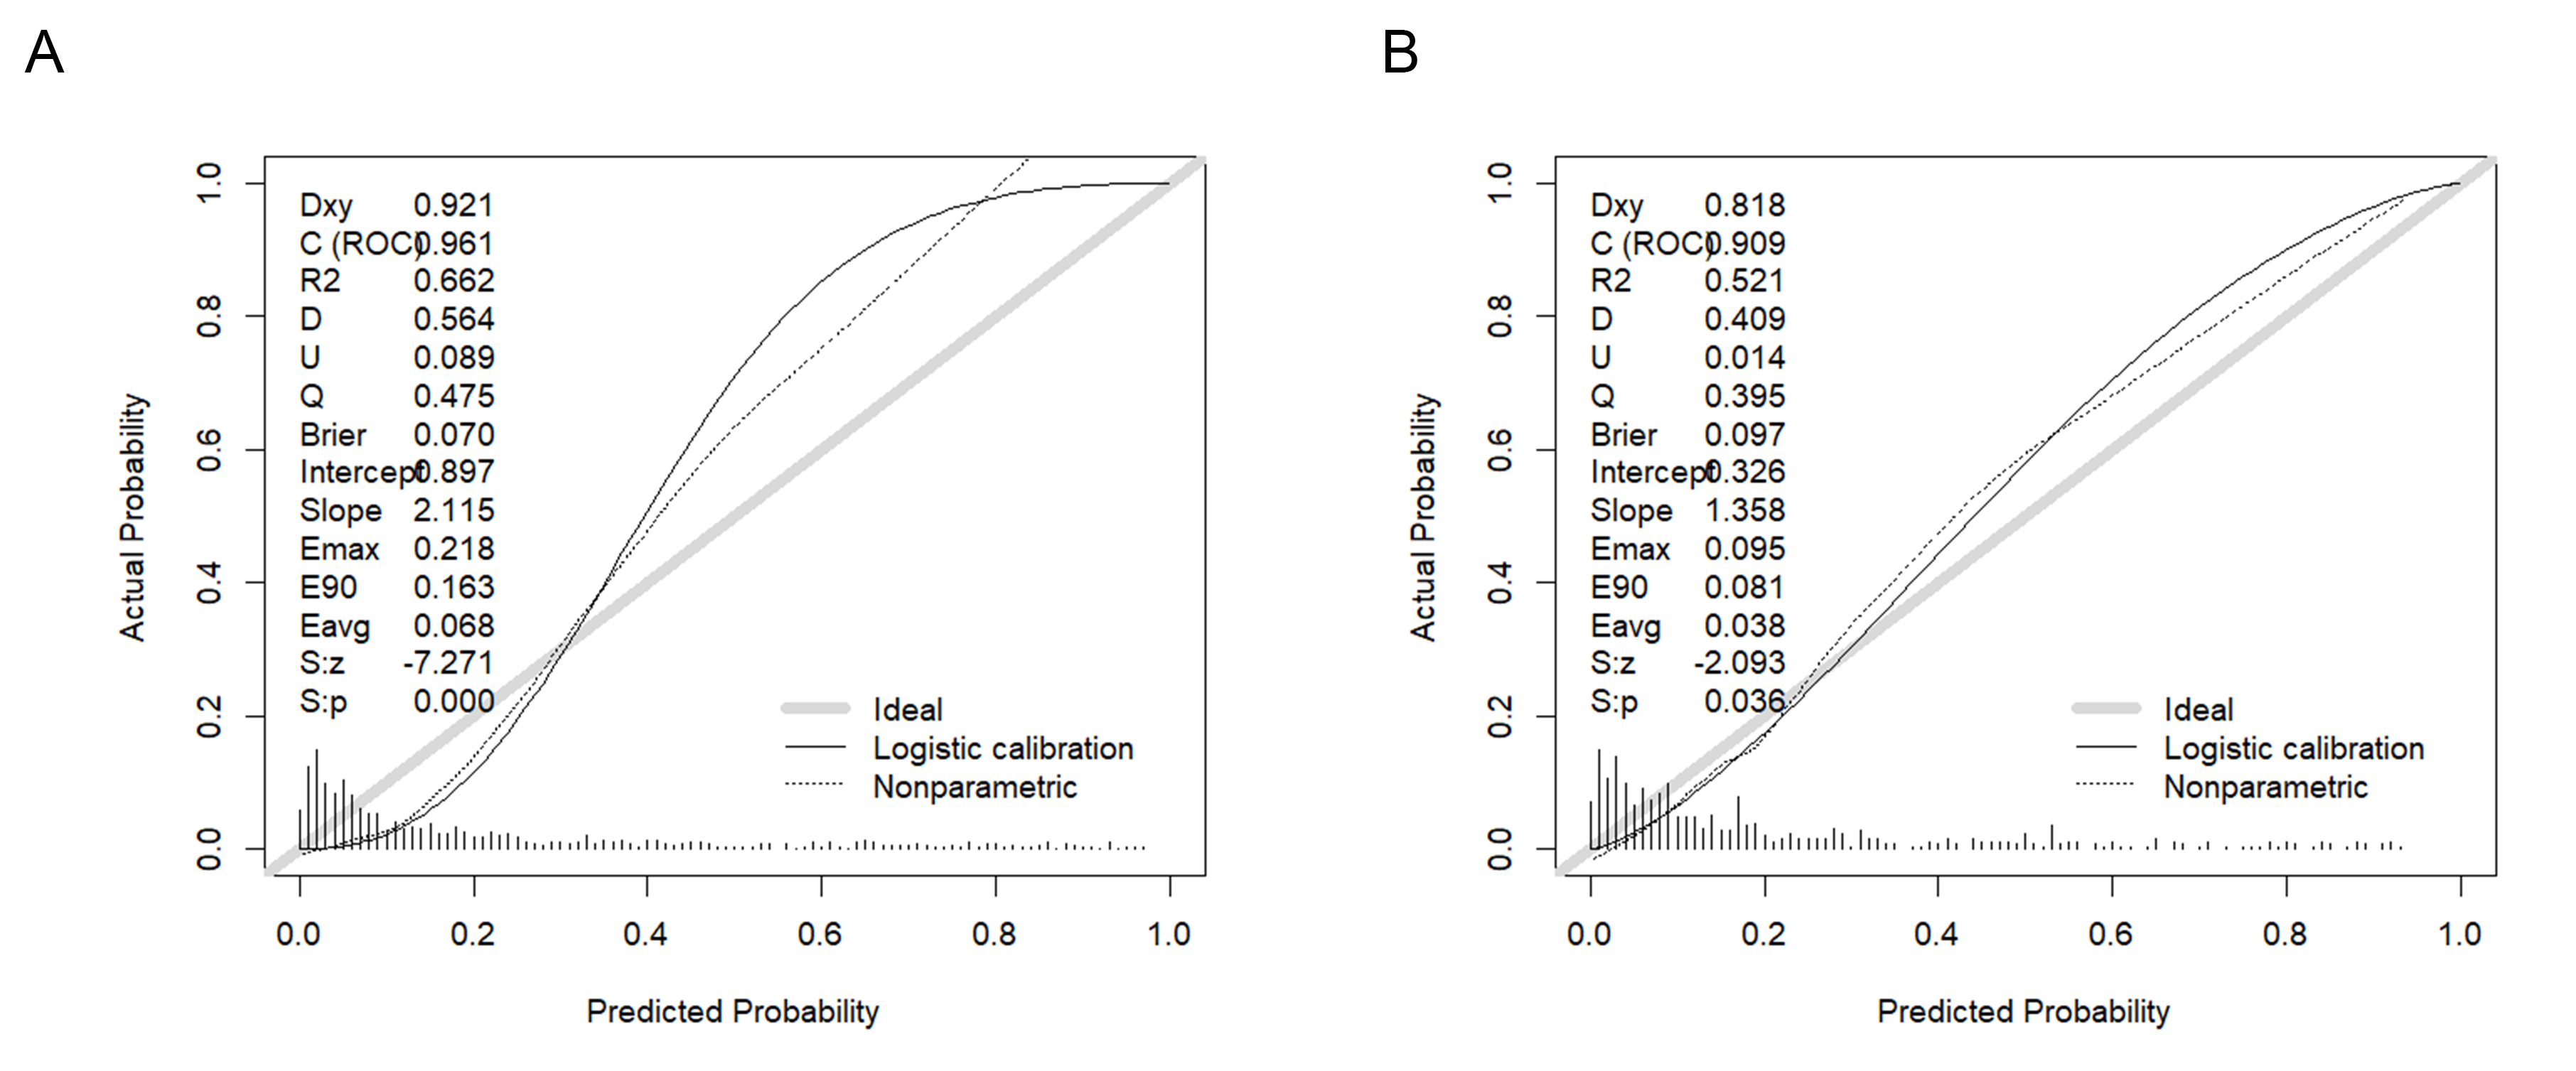


Figure S5 (A): Calibration curve of the XGBoost train set; (B): Calibration curve of the XGBoost validation set
